# Supplementary material for: Gender Differences in Fundamental Motor Skills Proficiency in Children Aged 3–6 Years: A Systematic Review and Meta-Analysis
Source: MDPI journal article supplement (doi:10.3390/ijerph19148318), 2022-07-07
Supplement: s1 [file s1]

## Search strategy

### 1.1. Search strategy for PubMed

URL: <https://www.ncbi.nlm.nih.gov/pubmed/>

Limits: until July 10, 2021

- #1 "Child"[MeSH Terms] OR "children"[Title/Abstract] OR "preschoolers"[Title/Abstract] OR "boy"[Title/Abstract] OR "girl"[Title/Abstract]
- #2 "Motor Skills"[MeSH Terms] OR "fundamental movement skills"[Title/Abstract] OR "motor development"[Title/Abstract] OR "gross motor"[Title/Abstract]
- #3 "TGMD"[Title/Abstract] OR "test of gross motor development"[Title/Abstract]
- #4 #1 AND #2 AND #3

### 1.2. Search strategy for Scopus

URL: <https://www.scopus.com>

Limits: until July 10, 2021

- #1 TITLE-ABS-KEY ("child" OR "children" OR "preschoolers" OR "boy" OR "girl")
- #2 TITLE-ABS-KEY ("motor skills" OR "fundamental movement skills" OR "motor development" OR "gross motor")
- #3 TITLE-ABS-KEY (TGMD OR "Test of Gross Motor Development")
- #4 #1 AND #2 AND #3

### 1.3. Search strategy for Web of science

URL: <https://www.webofscience.com>

Limits: until July 10, 2021

- #1 TS = (child or children or preschoolers or boy or girl)
- #2 TS = (motor skills or fundamental movement skills or motor development or gross motor)
- #3 TS = (TGMD or Test of Gross Motor Development)
- #4 #1 AND #2 AND #3

**Table S1.** The Joanna Briggs Institute (JBI) scale quality assessment table

| Cross-sectional        | Quality assessment |    |    |    |    |    |    |    |        |
|------------------------|--------------------|----|----|----|----|----|----|----|--------|
| Authors                | Q1                 | Q2 | Q3 | Q4 | Q5 | Q6 | Q7 | Q8 | Scores |
| Alessandro et al. 2018 | U                  | Y  | Y  | Y  | Y  | Y  | Y  | Y  | 7      |
| Aponte et al. 1990     | U                  | Y  | U  | U  | Y  | Y  | Y  | Y  | 5      |
| Aye et al. 2017        | Y                  | Y  | Y  | Y  | Y  | U  | Y  | Y  | 7      |
| Aye et al. 2018        | Y                  | Y  | Y  | Y  | Y  | U  | Y  | Y  | 7      |
| Bakhtiar 2014          | U                  | Y  | U  | Y  | Y  | Y  | Y  | Y  | 6      |
| Behan et al. 2019      | U                  | Y  | Y  | Y  | Y  | U  | Y  | Y  | 6      |
| Bolger et al. 2017     | U                  | Y  | Y  | Y  | Y  | Y  | Y  | Y  | 7      |
| Brian et al. 2018      | U                  | Y  | U  | Y  | Y  | Y  | Y  | Y  | 6      |

|                          |                    |   |   |   |   |   |   |   |   |   |    |   |   |
|--------------------------|--------------------|---|---|---|---|---|---|---|---|---|----|---|---|
| Brian et al. 2019        | Y                  | Y | U | Y | Y | Y | Y | Y | Y | 7 |    |   |   |
| Capio et al. 2021        | Y                  | Y | U | N | Y | Y | Y | Y | Y | 6 |    |   |   |
| Cliff et al. 2009        | U                  | Y | U | Y | Y | Y | Y | Y | Y | 6 |    |   |   |
| Famelia et al. 2018      | Y                  | Y | Y | U | Y | Y | Y | Y | Y | 7 |    |   |   |
| Freitas et al. 2018      | Y                  | Y | Y | Y | Y | Y | Y | Y | Y | 8 |    |   |   |
| Hall et al. 2018         | Y                  | Y | Y | Y | Y | U | Y | Y | Y | 7 |    |   |   |
| Hall et al. 2019         | Y                  | Y | Y | Y | Y | Y | Y | Y | Y | 8 |    |   |   |
| Henrique et al. 2020     | U                  | Y | Y | Y | Y | Y | Y | Y | Y | 7 |    |   |   |
| Jiang et al. 2018        | U                  | Y | Y | Y | Y | U | Y | Y | Y | 6 |    |   |   |
| Kim et al. 2016          | U                  | Y | Y | Y | U | U | Y | Y | Y | 5 |    |   |   |
| Kit et al. 2017          | Y                  | Y | U | Y | Y | Y | Y | Y | Y | 7 |    |   |   |
| Korbecki et al. 2017     | U                  | Y | U | U | Y | Y | Y | Y | Y | 5 |    |   |   |
| Lopes et al. 2017        | Y                  | Y | Y | Y | Y | Y | Y | Y | Y | 8 |    |   |   |
| Mukherjee et al. 2017    | U                  | Y | Y | Y | Y | U | Y | Y | Y | 6 |    |   |   |
| Nikolić et al. 2016      | U                  | Y | Y | Y | U | U | Y | Y | Y | 5 |    |   |   |
| Roscoe et al. 2019       | U                  | Y | Y | Y | Y | U | Y | Y | Y | 6 |    |   |   |
| Saczuk et al. 2021       | U                  | Y | U | Y | Y | U | Y | Y | Y | 5 |    |   |   |
| Soares et al. 2020       | U                  | Y | Y | Y | Y | Y | Y | Y | Y | 7 |    |   |   |
| Tietjens et al. 2018     | U                  | Y | Y | Y | Y | U | Y | Y | Y | 6 |    |   |   |
| Tomaz et al. 2019(1)     | U                  | Y | Y | Y | Y | Y | Y | Y | Y | 7 |    |   |   |
| Tomaz et al. 2019(2)     | Y                  | Y | Y | Y | Y | Y | Y | Y | Y | 8 |    |   |   |
| Valentini et al. 2012    | U                  | Y | Y | N | Y | Y | Y | Y | Y | 6 |    |   |   |
| Valentini et al. 2017    | U                  | Y | Y | N | Y | Y | Y | Y | Y | 6 |    |   |   |
| Webster et al. 2019      | U                  | Y | Y | Y | Y | Y | Y | Y | Y | 7 |    |   |   |
| Wong &Cheung 2006        | U                  | Y | Y | Y | Y | Y | Y | Y | Y | 7 |    |   |   |
| Case-control             | Quality assessment |   |   |   |   |   |   |   |   |   |    |   |   |
| Cheung et al. 2020       | Y                  | Y | Y | Y | Y | Y | Y | Y | Y | Y | 10 |   |   |
| Quasi-experimental       | Quality assessment |   |   |   |   |   |   |   |   |   |    |   |   |
| Kordi et al. 2012        | Y                  | Y | Y | U | U | Y | Y | Y | Y | Y | 7  |   |   |
| Palmer et al. 2020       | Y                  | Y | Y | Y | U | Y | Y | Y | Y | Y | 8  |   |   |
| Cohort study             | Quality assessment |   |   |   |   |   |   |   |   |   |    |   |   |
| Wang et al. 2020         | Y                  | N | Y | Y | Y | Y | Y | U | Y | U | Y  | 8 |   |
| Randomized control trial | Quality assessment |   |   |   |   |   |   |   |   |   |    |   |   |
| Shi et al. 2020          | Y                  | U | Y | U | U | U | Y | Y | Y | Y | Y  | Y | 9 |
